# Supplementary material
Source: MDPI journal article supplement (https://www.mdpi.com/2073-4441/14/9/1498)
Supplement: s1 [file s1]

Table S1. The search strategy of keywords is based on the Web of Science.

| Search strategy                                                                                                                                                                                                                                                                                                                                                                                                                                                                                                                                                                                                                                                                                                                                                                                                                                                                               |
|-----------------------------------------------------------------------------------------------------------------------------------------------------------------------------------------------------------------------------------------------------------------------------------------------------------------------------------------------------------------------------------------------------------------------------------------------------------------------------------------------------------------------------------------------------------------------------------------------------------------------------------------------------------------------------------------------------------------------------------------------------------------------------------------------------------------------------------------------------------------------------------------------|
| <p>[(iron-based materials) OR (zero-valent iron) OR (n-ZVI) OR (ferrous sulfide) OR (magnetite) OR (Iron-carbon composite) OR (iron-based catalyst) OR (Fe-based catalysts) OR (carbon-based catalysts) OR (iron oxides )] and [(repair) OR (remov* ) OR ( degrad* ) OR (Cataly* ) OR ( oxid * ) OR (oxida* ) OR (reduc* ) OR (Mineralization) OR (activat* ) OR (remediation)] and [(modif* ) OR (pyroly* ) OR (vulcanize* ) OR (sulfide-modified n-ZVI) OR(S-nZVI) OR (load* ) OR (curing) OR ( sulfide*)] and [(Organic Pollutants) OR (organic contaminants) OR (POP) OR (persistent organic pollutant) OR (chlorinated hydrocarbons) OR (halogenated hydrocarbons ) OR (TCE) OR (PCBs) OR (chlorinated organics) OR (Chlorinated Organic Compounds) OR (trichloroethene) OR (petroleum hydrocarbons)] and [(environment* ) OR (Water) OR (groundwater) OR ( wastewater) OR ( soil )]</p> |

Figure S1. Classification of published papers based on searches of the Web of Science databases. (a) The classification (percentage) of published papers based on organic pollutants, (b) The classification (percentage) of published papers based on advanced oxidation types, (c) The classification (percentage) of published papers based on iron-based materials. The relevant data of pollutant types, oxidation types, iron-based types, and modification types in each literature were extracted. The related data were shown in the Excel table in the **Supplementary Excel File 1**.

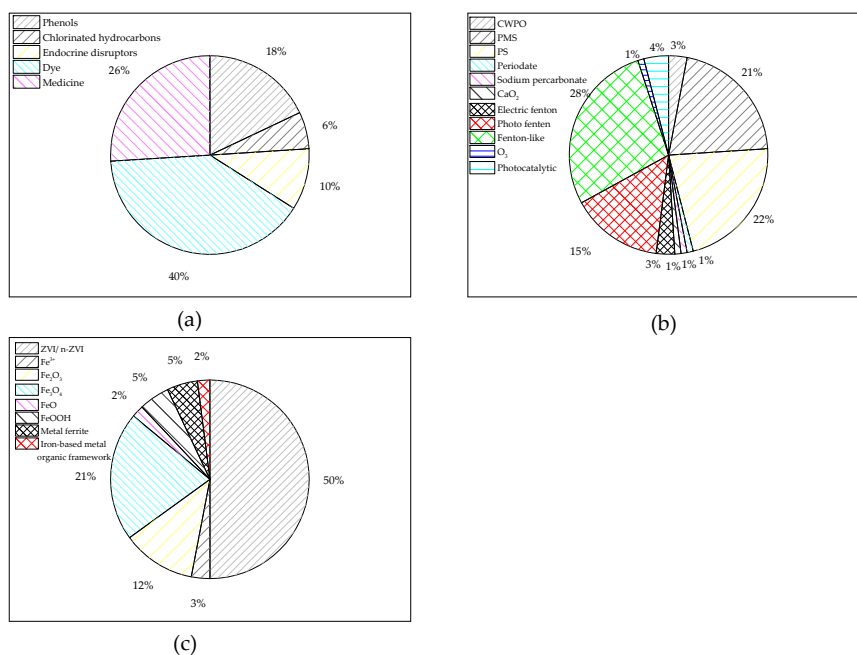

Table S2. The functional modification type of iron-based materials is based on the literature classification. All classifications are based on data extracted from relevant literature on the iron-based material modification for removal of organic pollutants searched in the Web of Science using keywords. The related data were shown in the Excel table in the **Supplementary Excel File 1**.

| Supporting materials    |                                |                                                                        | Stabilizer materials |                          | Doping second metal (bimetallic system) |
|-------------------------|--------------------------------|------------------------------------------------------------------------|----------------------|--------------------------|-----------------------------------------|
| Carbon-based materials  | Biochar                        | Doping with non-metallic elements: Boron (B), Nitrogen (N), Sulfur (S) | Chelating agents     | Ascorbic acid            | Co                                      |
|                         | Activated carbon               |                                                                        |                      | Tannic Acid              |                                         |
|                         | Graphene                       |                                                                        |                      | Citrate                  |                                         |
|                         | Carbon nanotubes               |                                                                        |                      | Nitrilotriacetic acid    | Ni                                      |
|                         | Salicylic acid                 |                                                                        |                      |                          |                                         |
|                         | Glutathione                    |                                                                        |                      |                          |                                         |
| SiO <sub>2</sub>        |                                |                                                                        |                      | Epigallocatechin gallate | Ag                                      |
| Clay minerals           | Natural sepiolite              |                                                                        | Polymer              | β-alaninediacetic acid   | Cu                                      |
|                         | Montmorillonite                |                                                                        |                      | Carboxymethyl cellulose  |                                         |
|                         | Calcite                        |                                                                        |                      | Chitosan                 | Al                                      |
|                         | Zeolite                        |                                                                        |                      | β-cyclodextrin           |                                         |
| Metal oxide             | MgO                            |                                                                        |                      | Surfactant               | Taxane diterpenoids                     |
|                         | Al <sub>2</sub> O <sub>3</sub> |                                                                        | Sulfide              |                          |                                         |
|                         | MnO <sub>2</sub>               |                                                                        |                      |                          |                                         |
| Metal-organic framework |                                |                                                                        |                      |                          |                                         |
